# Supplementary material for: Expanding the NMR toolkit for biological solids: oxygen-17 enriched Fmoc-amino acids
Source: Royal Society of Chemistry journal article supplement (doi:10.1039/d1nj02847b), 2021-01-01
Supplement: d1nj02847b1.pdf [file d1nj02847b1.pdf]

Supporting Information for

**Expanding the NMR Toolkit for Biological Solids:  
Oxygen-17 Enriched Fmoc-Amino Acids**

Brittney A. Klein<sup>1</sup>, Dylan G. Tkachuk<sup>1</sup>, Victor V. Terskikh<sup>2</sup> and Vladimir K. Michaelis<sup>1,\*</sup>

1. Department of Chemistry, University of Alberta, Edmonton, Alberta T6G 2G2, Canada

2. Metrology, National Research Council Canada, Ottawa, Ontario K1A 0R6, Canada

\* Corresponding Author: [vladimir.michaelis@ualberta.ca](mailto:vladimir.michaelis@ualberta.ca)

**Table S1.** Average deviations of the computed vs. experimental  $^{17}\text{O}$  NMR parameters plotted in Figures 5 & S4 for the CO and COH sites in the Fmoc-amino acids.

| $^{17}\text{O}$ Site | $\delta_{\text{iso}}$<br>(ppm) | $C_q$<br>(MHz) | $\eta$ | $q_{zz}$<br>(a.u.) | $q_{yy}$<br>(a.u.) | $q_{xx}$<br>(a.u.) | $\Omega^1$<br>(ppm) | $\kappa$ | $\delta_{11}$<br>(ppm) | $\delta_{22}$<br>(ppm) | $\delta_{33}$<br>(ppm) |
|----------------------|--------------------------------|----------------|--------|--------------------|--------------------|--------------------|---------------------|----------|------------------------|------------------------|------------------------|
| CO                   | 47                             | 0.4            | 0.11   | 0.07               | 0.10               | 0.07               | 77                  | 0.32     | 64                     | 97                     | 20                     |
| COH                  | 18                             | 1.2            | 0.33   | 0.20               | 0.35               | 0.16               | 55                  | 0.56     | 28                     | 63                     | 35                     |

<sup>1</sup> The deviations were calculated using the re-evaluated experimental span values for the CO sites in Fmoc-L-valine and -leucine, which in turn were used to extract the CSA tensor components. All correlations were calculated using the equation:  $[(\Sigma(\text{calc.} - \text{expt.})^2)/(\text{n})]^{1/2}$ .

**Table S2.** Selection of basis sets for computing NMR parameters using density functional theory on crystal structure of FMOC-L-tyrosine, monohydrate.

| Basis set | $^{17}\text{O}$<br>site | $\sigma_{\text{iso}}$<br>(ppm) | $\sigma_{33}$<br>(ppm) | $\sigma_{22}$<br>(ppm) | $\sigma_{11}$<br>(ppm) | $C_q$<br>(MHz) | $\eta$  |
|-----------|-------------------------|--------------------------------|------------------------|------------------------|------------------------|----------------|---------|
| DZP       | CO                      | -41.571                        | 281.028                | -131.463               | -274.278               | 7.88961        | 0.12270 |
|           | COH                     | 155.200                        | 256.063                | 177.473                | 32.065                 | -7.94763       | 0.37483 |
| ZORA/DZP  | CO                      | -39.327                        | 281.867                | -128.663               | -271.184               | 7.89293        | 0.11949 |
|           | COH                     | 156.896                        | 243.562                | 179.435                | 33.372                 | -7.54985       | 0.37714 |
| TZ2P      | CO                      | -88.756                        | 269.898                | -188.846               | -347.315               | 8.85450        | 0.13684 |
|           | COH                     | 132.856                        | 243.562                | 164.261                | -9.255                 | -9.07486       | 0.36192 |
| ZORA/TZ2P | CO                      | -86.815                        | 270.438                | -186.307               | -344.576               | 8.85790        | 0.13550 |
|           | COH                     | 134.330                        | 245.223                | 166.099                | -8.331                 | -9.07075       | 0.35039 |
| QZ4P      | CO                      | -96.012                        | 269.361                | -197.114               | -360.283               | 8.91513        | 0.13757 |
|           | COH                     | 125.903                        | 237.160                | 155.206                | -14.656                | -9.24279       | 0.34899 |
| ZORA/QZ4P | CO                      | -94.454                        | 269.623                | -194.977               | -358.008               | 8.92528        | 0.13409 |
|           | COH                     | 127.208                        | 238.691                | 156.840                | -13.907                | -9.25906       | 0.36450 |

**Table S3.** Comparison of the computed  $^{17}\text{O}$  NMR parameters<sup>1</sup> for Fmoc-L-tyrosine and -isoleucine obtained using their reported crystal structures with those obtained using different geometry-optimized structures.

| Sample            | Structure Coordinates | $^{17}\text{O}$ site | $\sigma_{\text{iso}}$ (ppm) | $\sigma_{33}$ (ppm) | $\sigma_{22}$ (ppm) | $\sigma_{11}$ (ppm) | $C_Q$ (MHz) | $\eta$  |
|-------------------|-----------------------|----------------------|-----------------------------|---------------------|---------------------|---------------------|-------------|---------|
| Fmoc-L-tyrosine   | X-ray                 | CO                   | -86.815                     | 270.438             | -186.307            | -344.576            | 8.85790     | 0.13550 |
|                   |                       | COH                  | 134.330                     | 245.223             | 166.099             | -8.331              | -9.07075    | 0.35039 |
|                   | ZORA/DZP              | CO                   | -93.091                     | 269.163             | -206.649            | -341.787            | 8.68533     | 0.13762 |
|                   |                       | COH                  | 108.232                     | 241.788             | 136.433             | -53.524             | -8.64595    | 0.57711 |
|                   | ZORA/TZ2P             | CO                   | -93.091                     | 260.277             | -220.836            | -318.558            | 8.85298     | 0.19300 |
|                   |                       | COH                  | 112.222                     | 243.997             | 142.508             | -49.840             | -8.70477    | 0.55091 |
|                   | ZORA/QZ4P             | CO                   | -84.404                     | 264.308             | -219.903            | -297.617            | 8.66492     | 0.15265 |
|                   |                       | COH                  | 108.858                     | 233.659             | 148.15              | -55.234             | -8.69706    | 0.50636 |
| Fmoc-L-isoleucine | X-ray                 | CO                   | -85.878                     | 281.835             | -190.302            | -349.168            | 8.93670     | 0.1735  |
|                   |                       | COH                  | 151.609                     | 263.304             | 207.206             | -15.684             | -8.38861    | 0.3534  |
|                   | ZORA/DZP              | CO                   | -77.928                     | 266.204             | -212.547            | -287.441            | 8.55007     | 0.12112 |
|                   |                       | COH                  | 93.889                      | 227.876             | 121.964             | -68.172             | -8.54004    | 0.53998 |
|                   | ZORA/TZ2P             | CO                   | -78.05                      | 268.236             | -215.276            | -287.106            | 8.59598     | 0.13323 |
|                   |                       | COH                  | 96.387                      | 229.723             | 125.097             | -65.660             | -8.59363    | 0.50872 |
|                   | ZORA/QZ4P             | CO                   | -75.628                     | 266.393             | -211.022            | -282.000            | 8.55424     | 0.12526 |
|                   |                       | COH                  | 99.299                      | 230.27              | 127.273             | -59.645             | -8.62249    | 0.49025 |

<sup>1</sup> All NMR parameters were computed using the ZORA/TZ2P basis set. The NMR parameters for the X-ray structure were obtained from a single molecule crystal structure and did not undergo geometry optimization.

**Table S4.** Density functional theory computed NMR parameters<sup>1</sup> on geometry-optimized structures.

| Sample            | <sup>17</sup> O site | $\sigma_{\text{iso}}$<br>(ppm) | $\sigma_{33}$<br>(ppm) | $\sigma_{22}$<br>(ppm) | $\sigma_{11}$<br>(ppm) | $C_Q$<br>(MHz) | $\eta$  |
|-------------------|----------------------|--------------------------------|------------------------|------------------------|------------------------|----------------|---------|
| Fmoc-L-tyrosine   | CO                   | -93.091                        | 269.163                | -206.649               | -341.787               | 8.68533        | 0.13762 |
|                   | COH                  | 108.232                        | 241.788                | 136.433                | -53.524                | -8.64595       | 0.57711 |
| Fmoc-L-proline    | CO                   | -88.920                        | 262.934                | -214.866               | -314.829               | 8.77591        | 0.14672 |
|                   | COH                  | 104.576                        | 240.112                | 130.684                | -57.068                | -8.57213       | 0.56200 |
| Fmoc-L-threonine  | CO                   | -82.932                        | 253.228                | -228.309               | -273.716               | 8.44669        | 0.10659 |
|                   | COH                  | 91.851                         | 213.172                | 136.461                | -74.080                | -8.50001       | 0.55040 |
| Fmoc-L-tryptophan | CO                   | -93.386                        | 253.942                | -213.848               | -320.252               | 8.79774        | 0.14495 |
|                   | COH                  | 101.394                        | 238.317                | 136.519                | -70.654                | -8.66472       | 0.56482 |
| Fmoc-L-isoleucine | CO                   | -77.928                        | 266.204                | -212.547               | -287.441               | 8.55007        | 0.12112 |
|                   | COH                  | 93.889                         | 227.876                | 121.964                | -68.172                | -8.54004       | 0.53998 |

<sup>1</sup> NMR parameters were calculated using zero-order regular approximation; triple-zeta polarized basis set (ZORA/TZ2P) after geometry optimization on each structure was implemented using the ZORA, double-zeta polarized basis set (ZORA/DZP).

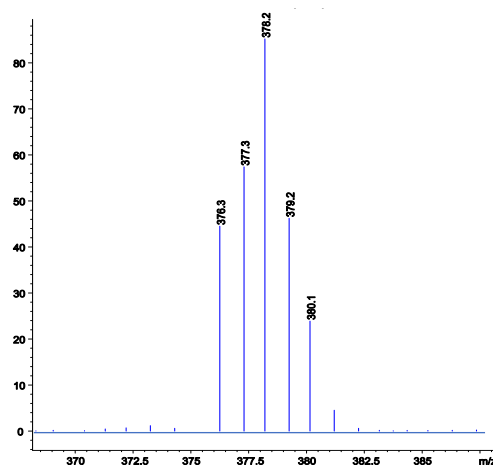

**Figure S1.** Mass spectrum of Fmoc-L-isoleucine after precipitation in acetonitrile and water. The expected MW for Fmoc-L-isoleucine is 353.41 Da and the  $[M+H]^+$  series shown in the spectrum have an additional +23 Da due to the presence of  $Na^+$ . The  $\alpha$ -COOH can have a mixture of contributions from  $^{16}O/^{16}O$  at 376.3 m/z,  $^{16}O/^{17}O$  or  $^{17}O/^{16}O$  at 377.3 m/z,  $^{17}O/^{17}O$  or  $^{16}O/^{18}O$  or  $^{18}O/^{16}O$  at 378.2 m/z,  $^{18}O/^{17}O$  or  $^{17}O/^{18}O$  at 379.2 and  $^{18}O/^{18}O$  at 380.1 m/z

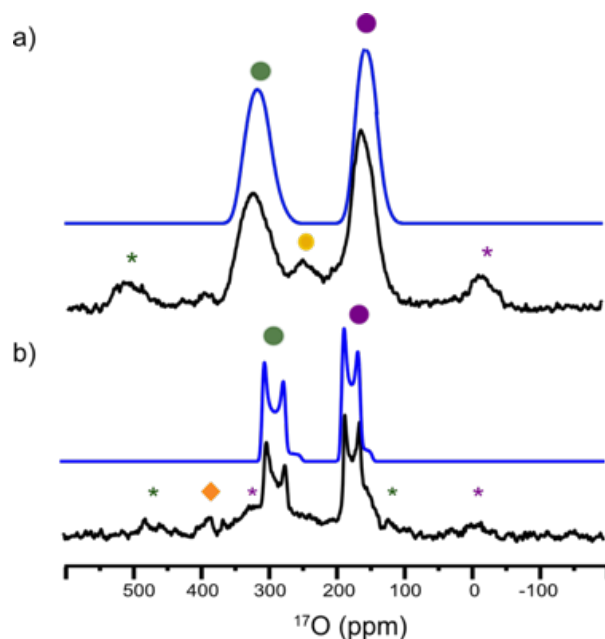

**Figure S2.** Experimental (black) and computed (blue) MAS NMR spectra of lyophilized (a) and recrystallized Fmoc-L-threonine (b) acquired at 21.1 T. The CO (green circle) and COH (purple circle)  $^{17}O$  NMR parameters are as follows:  $\delta_{iso}$  = 343 and 174 ppm,  $C_Q$  = 8.5 and 7.4 MHz and  $\eta$  = 0.50 and 0.40, respectively, for the lyophilized sample (a) and  $\delta_{iso}$  = 311 and 192 ppm,  $C_Q$  = 8.1 and 7.2 MHz and  $\eta$  = 0.05 and 0.08, respectively, for the recrystallized sample (b). The orange diamond in (b) indicates  $^{17}O$  signal from the  $ZrO_2$  from the NMR rotor and the coloured asterisks indicate spinning sidebands.

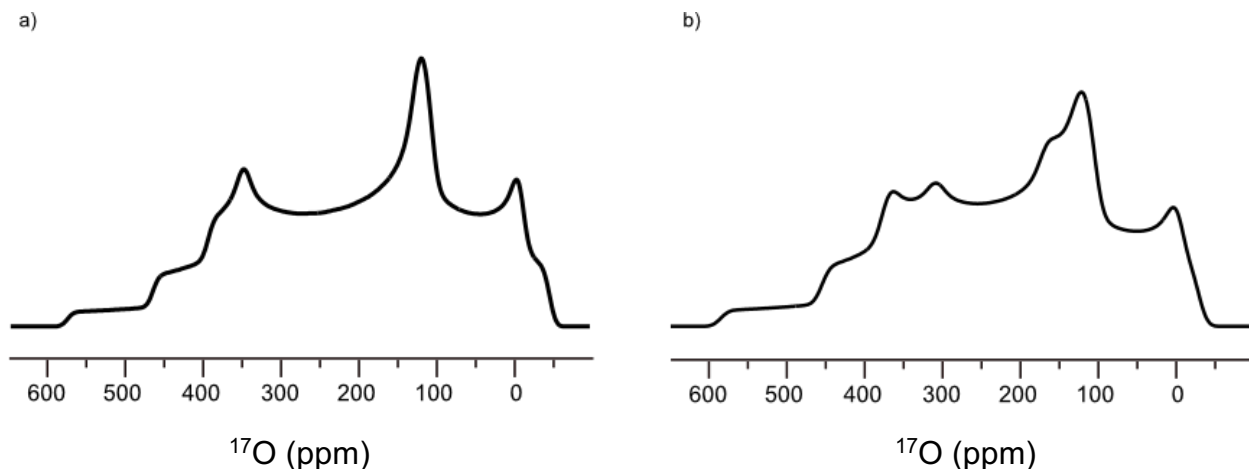

**Figure S3.** Simulation of non-spinning NMR spectra at 17.6 T for Fmoc-L-leucine (a) and Fmoc-L-valine (b) from Keeler *et al.* (2017) using spans ( $\Omega$ ) for the CO site of 530 and 540 ppm, respectively. All other NMR parameters are identical to what are reported in Table 1.

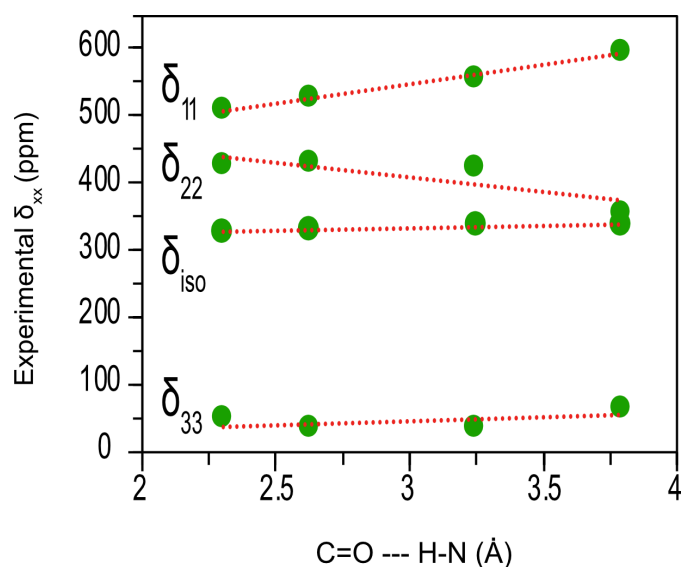

**Figure S4.** Correlation of the intramolecular hydrogen bond distance between the NH and C=O group from X-ray structures with the experimental CSA tensor components for the carbonyl oxygen site. X-ray structure of Fmoc-L serine (CIF-4514078), -tyrosine (CIF-7220755), -isoleucine (CIF-2219071) and -leucine (CIF-2218405) were used to measure the distance between the C=O and H-N groups in each molecule. The linear correlations are as follows :  $\delta_{11}$  ( $y = 56.5x + 376.6$ ,  $R^2 = 0.99$ ),  $\delta_{22}$  ( $y = -45.0x + 543.2$ ,  $R^2 = 0.71$ ),  $\delta_{iso}$  ( $y = 7.3x + 311.4$ ,  $R^2 = 0.93$ ) and  $\delta_{33}$  ( $y = 10.4x + 14.5$ ,  $R^2 = 0.24$ ).

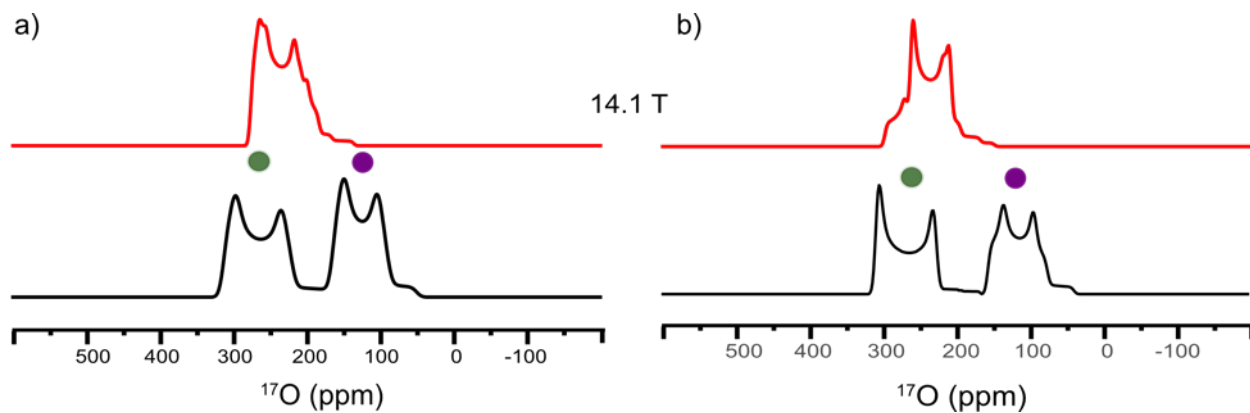

**Figure S5.** Simulated MAS NMR spectra of deprotonated (red) and protonated (black) Fmoc-L-tyrosine (a) and Fmoc-L-isoleucine (b) at 14.1 T. Deprotonated spectra were simulated using new computed NMR parameters for  $\delta_{\text{iso}}$  and  $C_Q$  after a proton was removed from the original geometry-optimized structures. The asymmetry values ( $\eta$ ) were held constant between both species and the  $\delta_{\text{iso}}$  and  $C_Q$  for the CO (green circle) and COH (purple circle) sites in the protonated Fmoc-amino acids are reported in Table 1.
